# Supplementary material
Source: publisher figshare collection journal article supplement (https://springernature.figshare.com/ndownloader/files/31577450)
Supplement: Supplementary file [file 31577450]

**Ocular ultrasound** Not performed / evaluation not possible: 157 (65.6%)

Optic nerve sheath diameter indicating intracerebral pressure below 20 mmHg: 95 (96.9%)

Optic nerve sheath diameter indicating intracerebral pressure above 20 mmHg: 3 (3.1%)

Additional findings

None

**Vascular ultrasound** Not performed / evaluation not possible: 0 (0%)

|                             |                              |                           |
|-----------------------------|------------------------------|---------------------------|
| Left internal jugular vein  | non-compressible: 27 (10.6%) | compressible: 222 (87.1%) |
| Right internal jugular vein | non-compressible: 46 (18%)   | compressible: 192 (75.3%) |
| Left axillary vein          | non-compressible: 2 (0.8%)   | compressible: 246 (96.5%) |
| Right axillary vein         | non-compressible: 0 (0%)     | compressible: 251 (98.4%) |
| Left femoral vein           | non-compressible: 7 (2.7%)   | compressible: 226 (88.6%) |
| Right femoral vein          | non-compressible: 6 (2.4%)   | compressible: 225 (88.2%) |
| Left popliteal vein         | non-compressible: 6 (2.4%)   | compressible: 233 (91.4%) |
| Right popliteal vein        | non-compressible: 10 (3.9%)  | compressible: 238 (93.3%) |

|                    |                                                                                                                                                                                            |
|--------------------|--------------------------------------------------------------------------------------------------------------------------------------------------------------------------------------------|
| Inferior vena cava | not performed / evaluation not possible: 37 (14.5%)<br>distended IVC (normal with PEEP): 97 (38%)<br>non-distended IVC: 54 (21.2%)<br>IVC indicating volume deficit: 66 (25.9%)            |
| Abdominal aorta    | not performed / evaluation not possible: 120 (47.1%)<br>no aneurysm: 30 (11.8%)<br>aneurysm: 5 (2%)<br>aorta not assessable in full length; no aneurysm in assessable sections: 98 (38.4%) |

Additional findings (non-exhaustive list)

Arteriovenous fistula after percutaneous coronary intervention

|                                     |                                   |
|-------------------------------------|-----------------------------------|
| Carotid stenosis                    | Inferior vena cava thrombus       |
| Arterial calcification and stenosis | Cysts and masses in thyroid gland |
| Abdominal / femoral stents          | Acute arterial occlusion          |

**Pulmonary ultrasound** Not performed / evaluation not possible: 98 (38.4%)

|                                   |                                                                            |
|-----------------------------------|----------------------------------------------------------------------------|
| Physiologic lung sliding          | yes: 203 (79.6%)<br>absent on left: 23 (9%)    absent on right: 30 (11.8%) |
| Interstitial syndrome (B-profile) | no: 185 (72.5%)                                                            |

|                                        |                       |                        |                       |
|----------------------------------------|-----------------------|------------------------|-----------------------|
|                                        | focal left: 15 (5.9%) | focal right: 11 (4.3%) | bilateral: 42 (16.5%) |
| Lung consolidation                     | no: 60 (23.5%)        |                        |                       |
|                                        | left: 171 (67.1%)     |                        |                       |
|                                        | apical: 1 (0.4%)      | medial: 41 (16.1%)     | basal: 171 (67.1%)    |
|                                        | right: 157 (61.6%)    |                        |                       |
|                                        | apical: 2 (0.8%)      | medial: 22 (8.6%)      | basal: 156 (61.2%)    |
| Signs of pneumothorax                  | no: 156 (61.2%)       |                        |                       |
|                                        | left: 19 (7.5%)       | right: 15 (5.9%)       |                       |
| Pneumothorax (detection of lung point) |                       |                        |                       |
|                                        | no: 244 (95.7%)       |                        |                       |
|                                        | left: 4 (1.6%)        | right: 6 (2.4%)        |                       |
| Pulmonary edema                        | no: 202 (79.2%)       | yes: 52 (20.4%)        |                       |
| Suspected pneumonic infiltrates        | no: 234 (91.8%)       | left: 10 (3.9%)        | right: 6 (2.4%)       |
| Pleural effusion / hemothorax          | no: 109 (42.7%)       | left: 125 (49%)        | right: 95 (37.3%)     |
| Thoracentesis indicated                | left: 29 (11.4%)      | right: 16 (6.3%)       |                       |
| Basal atelectasis                      | no: 94 (36.9%)        | left: 132 (51.8%)      | right: 98 (38.4%)     |
| Compression atelectasis                | no: 209 (82%)         | left: 27 (10.6%)       | right: 21 (8.2%)      |

Additional findings (non-exhaustive list)

|                                      |                                            |
|--------------------------------------|--------------------------------------------|
| Masses, suspected metastases         | Lung contusion                             |
| Rib fractures                        | Suspected pleural empyema                  |
| Pulmonary emphysema                  | Diaphragmatic elevation                    |
| Lung resection                       | Subcutaneous emphysema (aerodermelectasia) |
| Pleural effusions despite chest tube |                                            |

|                                 |                                                    |
|---------------------------------|----------------------------------------------------|
| <b>Focused echocardiography</b> | Not performed / evaluation not possible: 11 (4.3%) |
|---------------------------------|----------------------------------------------------|

## Visual left ventricular ejection fraction (LVEF)

not performed / evaluation not possible: 10 (3.9%)  
segmental wall motion abnormalities: 29 (11.4%)  
global hypokinesia / akinesia: 13 (5.1%)  
normal (LVEF > 55%): 174 (68.2%)  
mildly abnormal (LVEF > 45–55%): 24 (9.4%)  
moderately abnormal (LVEF 30–45%): 21 (8.2%)  
severely abnormal (LVEF < 30%): 15 (5.9%)

|                      |                                                   |
|----------------------|---------------------------------------------------|
| Pericardial effusion | not performed / evaluation not possible: 9 (3.5%) |
|                      | no: 195 (76.5%)                                   |
|                      | yes, not hemodynamically significant: 39 (15.3%)  |
|                      | yes, hemodynamically significant: 0 (0%)          |

|                     |                                                     |
|---------------------|-----------------------------------------------------|
| Heart valve disease | not performed / evaluation not possible: 37 (14.5%) |
|---------------------|-----------------------------------------------------|

## Moderate to severe regurgitation

no: 173 (67.8%)  
aortic valve: 10 (3.9%)  
mitral valve: 12 (4.7%)  
tricuspid valve: 16 (6.3%)

## Moderate to severe heart valve stenosis

no: 196 (76.9%)  
aortic valve: 11 (4.3%)  
mitral valve: 1 (0.4%)  
tricuspid valve: 0 (0%)

## Echocardiographic signs of volume deficit

no: 182 (71.4%)  
yes, left ventricle: 47 (18.4%)  
yes, right ventricle: 38 (14.9%)

## Additional findings (non-exhaustive list)

Hypertrophic cardiomyopathy with systolic anterior motion (SAM) of mitral valve leaflet

|                                     |                                                            |
|-------------------------------------|------------------------------------------------------------|
| Endocarditis                        | Floating structure in left ventricle after cardiac surgery |
| Ascending aortic aneurysm           | Atrial septal aneurysm                                     |
| Suspected pulmonary hypertension    | Right ventricular dysfunction                              |
| Floating structure in right atrium  | Myocardial aneurysm                                        |
| Moderate pulmonary insufficiency    | Impella® pump malposition                                  |
| Stenosis of mechanical mitral valve | Left ventricular air bubbles                               |
| Right ventricular dilatation        |                                                            |

## **Focused abdominal ultrasound**

Not performed / evaluation not possible: 3 (1.2%)

### Gallbladder

not performed / evaluation not possible: 11 (4.3%)  
no obvious abnormalities: 97 (38%)  
gallbladder not sufficiently assessable: 62 (24.3%)  
sludge: 46 (18%)  
cholelithiasis: 32 (12.5%)  
atonic gallbladder: 10 (3.9%)

### Suspected cholecystitis

no: 128 (50.2%)  
wall thickening > 3 mm: 45 (17.6%)  
perivesicular fluid: 12 (4.7%)

### Suspected cholestasis

no: 187 (73.3%)  
dilated CBD: 42 (16.5%)  
double-barrel phenomenon: 0 (0%)

### Pancreas

not performed / evaluation not possible: 196 (76.9%)  
no obvious abnormalities: 43 (16.9%)

signs of pancreatitis: 4 (1.6%)

#### Liver

not performed / evaluation not possible: 4 (1.6%)

no obvious abnormalities: 4 (1.6%)

reduced liver size: 0 (0%)

liver enlargement (hepatomegaly): 40 (15.7%)

signs of cirrhosis: 11 (4.3%)

dilated hepatic portal vein: 11 (4.3%)

dilated hepatic veins: 22 (8.6%)

suspected liver hematoma: 1 (0.4%)

#### Spleen

not performed / evaluation not possible: 9 (3.5%)

no obvious abnormalities: 187 (73.3%)

splenomegaly: 42 (16.5%)

splenic hematoma: 3 (1.2%)

#### Kidneys

not performed / evaluation not possible: 6 (2.4%)

##### Kidney size

normal: 172 (67.5%)

reduced: 17 (6.7%)

left: 9 (3.5%)

right: 15 (5.9%)

enlarged: 57 (22.4%)

left 39 (15.3%)

right: 44 (17.3%)

##### Dilated renal pelvis

no: 235 (92.2%)

left: 5 (1.2%)

right: 2 (0.8%)

##### Reduced renal parenchyma

no: 201 (78.8%)

yes: 43 (16.9%)

##### Urolithiasis

no: 243 (95.3%)

yes: 0 (0%)

#### Intestinal

not performed / evaluation not possible: 1 (0.4%)

##### Peristalsis

normal: 88 (34.5%)

weak: 146 (57.3%)

absent: 16 (6.3%)

##### Suspected ileus

no: 242 (94.9%)

yes: 8 (3.1%)

#### Urinary bladder

not performed / evaluation not possible: 77 (30.2%)

empty: 154 (60.4%)

filled: 13 (5.1%)

distended: 6 (2.4%)

bladder tamponade: 0 (0%)

#### Pneumoperitoneum

not performed / evaluation not possible: 235 (92.2%)

no: 3 (1.2%)

yes: 14 (5.5%)

#### Free fluid / ascites

not performed / evaluation not possible: 0 (0%)

no: 156 (61.2%)

minimal: 49 (19.2%)

moderate: 41 (16.1%)

massive: 6 (2.4%)

##### Location

diffuse: 25 (9.8%)

hepatorenal recess: 7 (2.7%)

splenorenal recess: 4 (1.6%)

around bladder: 29 (11.4%)

other location: 59 (23.1%)

Additional findings (non-exhaustive list)

Intraparenchymal lesions / metastases / masses

Simple and complex cysts

Splenic septic emboli

Uterine abnormalities

Renal infarction

Unintentional duodenal position of gastric tube

Retroperitoneal hematoma

Occlusion of the portal vein

Bowel wall thickening

Para-aortic lymph node metastases

Duplex kidneys
